# Supplementary material for: Spatial and temporal evolution analysis of carbon emissions and ecosystem service value from land use in Henan province
Source: Research Square preprint supplement (doi:10.21203/rs.3.rs-6603512/v1), 2025-06-09
Supplement: Supplementary file 1 [file 7d1ad8d032a339c7c0419b16.xlsx]

## Sheet: Land data and carbon emission f
The land use data	Unit:m²
	Type	2002	2007	2012	2017	2022
	plow land	113971	112029	109627	106793	105530
	woodland	27039.3	27896.9	28215.6	28891.3	29662.1
	grasslands	3291.58	2530.96	2725.75	2585.99	1605.29
	body of water	1592.88	1806.36	1750.13	1914.64	1945.01
	unutilized land	7.1253	2.9295	3.4542	1.8243	2.7225
	building site	16412.5	18048.6	19993	22127.8	23569.3
	add up the total	162315	162315	162315	162315	162315
Carbon Emission Coefficients for Different Land Use Types
	Type of land use	plow land	woodland	grasslands	body of water	unutilized land
	Carbon emission factor/t·hm-2	0.422	-0.644	-0.022	-0.253	-0.005
Carbon Emission Coefficients and Standard Coal Conversion Coefficients for Various Energy Sources	Unit:hm²
	Type of energy	raw coal	coking coal	gasoline	crude oil	diesel	diesel fuel	immediate purchase	electrical power
	Standard coal conversion factor	0.7143	0.9714	1.4714	1.4248	1.4714	1.4571	1.2143	0.404
	Carbon emission factor	0.7559	0.855	0.5714	0.5857	0.5538	0.5921	0.4483	0.7935

## Sheet: energy consumption
		Unit：10000 tons						Unit：billion cubic meters	billion kilowatt-hours (kWh)
		Coal consumption	Coke consumption	Crude oil consumption	Gasoline consumption	Kerosene consumption	Diesel consumption	Natural gas consumption	Electricity consumption	Total
	2002	5579.19	419.817	502.072	97.3759	11.1653	134.822	7.96414	293.726	7046.13
	2007	12510.9	1193.54	595.695	171.854	14.3181	397.305	18.0404	597.595	15499.3
	2012	13628.1	1845.42	842.867	347.881	44.8881	636.873	40.2399	938.064	18324.3
	2017	12240.1	1856.87	549.472	553.446	60.8372	799.88	56.6527	1014.99	17132.2
	2022	13118.3	1314.29	730.776	652.565	80.4185	1009.48	67.2243	1256.79	18229.8

## Sheet: Equivalent value of ecosystem s
		Provisioning service			Regulating service				Supporting service			Cultural service
Equivalent value of ecosystem services		Food production	Raw materials production	Water production	Gas production	Climate production	Purify environment	Hydrological regulation	Soil conservation	Maintenance nutrient circulation	biodiversity	Aesthetically landcape
	plow land	0.85	0.4	0.02	0.67	0.36	0.10	0.27	1.03	0.12	0.13	0.06
	woodland	0.2525	0.58	0.3	1.9075	5.7075	1.6725	3.735	2.3225	0.1775	2.115	0.9275
	grasslands	0.233333	0.343333	0.19	1.20667	3.19	1.05333	2.33667	1.47	0.113333	1.33667	0.59
	body of water	0.655	0.365	5.44	1.335	2.945	4.575	63.235	1.62	0.125	5.21	3.31
	unutilized land	0	0	0	0	0	0	0	0	0	0	0
	building site	0.01	0.03	0.02	0.11	0.10	0.31	0.21	0.13	0.01	0.12	0.05
	agricultural prices
	Yuan/kg	2002	2007	2012	2017	2022	average value
	maize	1.025	1.5116	2.1662	2.2002	3.007	1.982
	corn	0.912	1.4952	2.2226	1.5826	2.695	1.78148
	paddy	1.0278	1.7042	2.7614	2.757	2.7878	2.20764
	Production value (kg/hm²)	2002	2007	2012	2017	2022	average value
	maize	4630.41	5716.52	5893.56	6483.72	6709.62	5886.77
	corn	5128.5	5693.07	5642.49	5426.79	5897.7	5557.71
	paddy	7167.66	7275	7604.1	7889.86	7963.27	7579.98
	Sown area (thousands of hectares)	2002	2007	2012	2017	2022	average value
	maize	4855.7	5213.33	5468.8	5714.64	5682.45	5386.98
	corn	2319.9	2779.22	3564.7	3998.94	3857.52	3304.06
	paddy	469.4	600	621.77	615.03	601.7	581.58
	总播种面积	7645	8592.55	9655.27	10328.6	10141.7	9272.62
	Production (10000 tons)	2002	2007	2012	2017	2022	average value
	maize	2248.39	2980.21	3223.07	3705.21	3812.71	3193.92
	corn	1189.76	1582.23	2011.38	2170.14	2275.05	1845.71
	paddy	336.45	436.5	472.8	485.25	479.15	442.03
